# Supplementary material for: Derangements and Reversibility of Energy Metabolism in Failing Hearts Resulting from Volume Overload: Transcriptomics and Metabolomics Analyses
Source: MDPI journal article supplement (doi:10.3390/ijms23126809), 2022-06-18
Supplement: s1 [file s1]

**Table S1. Echocardiography and hemodynamic study**

|                    |             |             |             |             |             |             | <i>p</i> value    |                                  |                    |                                   |           |
|--------------------|-------------|-------------|-------------|-------------|-------------|-------------|-------------------|----------------------------------|--------------------|-----------------------------------|-----------|
|                    |             |             |             |             |             |             | CH vs.<br>Sham 8W | CH <sub>COV</sub> vs.<br>Sham 8W | HF vs.<br>Sham 16W | HF <sub>COV</sub> vs.<br>Sham 16W | CH vs. HF |
| FS (%)             | 47.0 ± 4.0  | 44.9 ± 3.1  | 46.0 ± 4.1  | 47.7 ± 5.6  | 35.5 ± 5.8  | 36.2 ± 3.2  | 0.365             | 0.704                            | <0.001             | <0.001                            | 0.002     |
| LVEDD (mm)         | 6.9 ± 0.3   | 9.4 ± 0.6   | 8.6 ± 0.9   | 7.5 ± 0.6   | 11.4 ± 0.8  | 8.9 ± 0.5   | <0.001            | 0.005                            | <0.001             | 0.0014                            | <0.001    |
| LVESD (mm)         | 3.6 ± 0.2   | 5.2 ± 0.4   | 4.6 ± 0.7   | 3.9 ± 0.5   | 7.3 ± 1.0   | 5.5 ± 0.5   | <0.001            | 0.02                             | <0.001             | <0.001                            | <0.001    |
| IVS thickness (mm) | 1.7 ± 0.2   | 2.1 ± 0.3   | 1.9 ± 0.2   | 1.7 ± 0.3   | 2.1 ± 0.3   | 1.9 ± 0.3   | 0.022             | 0.1                              | 0.029              | 0.241                             | >0.999    |
| LVEDD/PW thickness | 4.1 ± 0.4   | 4.8 ± 0.4   | 4.5 ± 0.6   | 4.0 ± 0.7   | 5.3 ± 0.6   | 4.9 ± 0.6   | 0.013             | 0.204                            | 0.006              | 0.038                             | 0.12      |
| LA diameter (mm)   | 4.0 ± 0.3   | 6.7 ± 1.0   | 4.9 ± 0.5   | 4.8 ± 0.8   | 6.8 ± 1.3   | 6.1 ± 0.5   | <0.001            | <0.001                           | 0.003              | 0.002                             | 0.922     |
| LVEDP (mmHg)       | 5 ± 1       | 7 ± 4       | 6 ± 3       | 5 ± 1       | 12 ± 2      | 11 ± 3      | 0.261             | 0.452                            | <0.001             | <0.001                            | 0.008     |
| +dP/dtmax (mmHg/s) | 5684 ± 298  | 4737 ± 476  | 5883 ± 433  | 5899 ± 476  | 3737 ± 476  | 3972 ± 452  | 0.002             | 0.161                            | <0.001             | <0.001                            | 0.001     |
| -dP/dtmax (mmHg/s) | -5504 ± 324 | -4435 ± 438 | -4924 ± 542 | -5074 ± 432 | -3422 ± 358 | -3744 ± 432 | <0.001            | 0.039                            | <0.001             | <0.001                            | <0.001    |

Abbreviations: CH, compensated hypertrophy; COV, correction of volume overload; +dP/dt, the maximum positive value of the first derivative of left ventricular pressure; -dP/dt, the maximum negative value of the first derivative of left ventricular pressure; FS, fractional shortening; HF, heart failure; IVS, interventricular septum; LA, left atrium; LVEDD, left ventricular end-diastolic diameter; LVEDP, left ventricular end-diastolic pressure; LVESD, left ventricular end-systolic diameter; LVPW, left ventricular posterior wall.

**Table S2. Differentially expressed genes (fold change > 1.5 and *p* value < 0.05) involved in glycolysis, the hexosamine biosynthetic pathway, and fatty acid metabolism (Genes involved in the tricarboxylic acid cycle were not significantly changed; data not shown)**

| Gene symbol                     | Gene description                                                     | Log <sub>2</sub> (fold change) |                   |          |                   |          | <i>p</i> value |                   |        |                       |        |
|---------------------------------|----------------------------------------------------------------------|--------------------------------|-------------------|----------|-------------------|----------|----------------|-------------------|--------|-----------------------|--------|
|                                 |                                                                      | CH vs.                         | CH <sub>COV</sub> | HF vs.   | HF <sub>COV</sub> | CH vs.   | CH vs.         | CH <sub>COV</sub> | HF vs. | HF <sub>COV</sub> vs. | CH vs. |
|                                 |                                                                      | Sham                           | vs. Sham          | Sham     | vs. Sham          | HF       | Sham           | vs. Sham          | Sham   | Sham                  | HF     |
| Glucose uptake                  |                                                                      |                                |                   |          |                   |          |                |                   |        |                       |        |
| Slc2a4                          | solute carrier family 2 (facilitated glucose transporter), member 4  | -0.3419                        | -0.1586           | -0.8646* | -0.3559           | -0.5228  | 0.0440         | 0.1974            | 0.0070 | 0.0699                | 0.0619 |
| Glycolysis                      |                                                                      |                                |                   |          |                   |          |                |                   |        |                       |        |
| Pfkm                            | phosphofructokinase, muscle                                          | -0.3427                        | 0.2891            | -0.9244* | -0.3785           | -0.5816  | 0.2464         | 0.3212            | 0.0047 | 0.2573                | 0.0071 |
| Pfkfb1                          | 6-phosphofructo-2-kinase/fructose-2,6-biphosphatase 1                | -0.7069*                       | -0.5204           | -0.7464* | -0.6889*          | -0.0394  | 0.0014         | 0.0408            | 0.0264 | 0.0006                | 0.8802 |
| Aldob                           | aldolase B, fructose-bisphosphate                                    | -0.4082                        | -0.2667           | -0.7118* | -0.6022*          | -0.3036  | 0.0288         | 0.1829            | 0.0203 | 0.0007                | 0.2737 |
| Pgam2                           | phosphoglycerate mutase 2 (muscle)                                   | -0.2426                        | -0.0736           | -0.8518* | -0.3367           | -0.6092  | 0.0472         | 0.2124            | 0.0174 | 0.0132                | 0.0679 |
| Eno3                            | enolase 3, beta, muscle                                              | -0.6617                        | -0.3597           | -1.0452* | -0.2330           | -0.3836  | 0.0962         | 0.0974            | 0.0048 | 0.3162                | 0.2872 |
| Hexosamine biosynthetic pathway |                                                                      |                                |                   |          |                   |          |                |                   |        |                       |        |
| Gfpt2                           | glutamine-fructose-6-phosphate transaminase 2                        | 0.6040                         | 0.1159            | 0.7365*  | 0.2544            | 0.1325   | 0.0195         | 0.6600            | 0.0451 | 0.2535                | 0.6481 |
| Uap1                            | UDP-N-acetylglucosamine pyrophosphorylase 1                          | 1.0615*                        | -0.0208           | 1.0344*  | 0.1167            | -0.0271  | 0.0011         | 0.9373            | 0.0215 | 0.5112                | 0.9397 |
| Fatty acid metabolism           |                                                                      |                                |                   |          |                   |          |                |                   |        |                       |        |
| Ppargc1b                        | peroxisome proliferator-activated receptor gamma, coactivator 1 beta | -0.4012                        | 0.1075            | -0.6266* | -0.2632           | -0.2254  | 0.0372         | 0.1608            | 0.0059 | 0.0024                | 0.4842 |
| Rxra                            | Retinoid X receptor alpha                                            | -0.4429                        | -0.2918           | -0.6918* | -0.3683           | -0.2489  | 0.0078         | 0.1301            | 0.0023 | 0.0024                | 0.1853 |
| Acs11                           | acyl-CoA synthetase long-chain family member 1                       | -0.2391                        | -0.0789           | -0.6058* | -0.0896           | -0.3667  | 0.1345         | 0.1907            | 0.0018 | 0.2423                | 0.0638 |
| Acs16                           | acyl-CoA synthetase long-chain family member 6                       | 0.1440                         | 0.0290            | -0.4446  | -0.2660           | -0.5886* | 0.6103         | 0.9154            | 0.1291 | 0.2713                | 0.0291 |
| Acsf2                           | acyl-CoA synthetase family member 2                                  | -0.5694                        | 0.0507            | -0.9147* | -0.2779           | -0.3453  | 0.0011         | 0.8084            | 0.0047 | 0.0981                | 0.1676 |
| Acsf3                           | acyl-CoA synthetase family member 3                                  | -0.3307                        | -0.2146           | -0.6604* | -0.4038           | -0.3296  | 0.1743         | 0.1215            | 0.0094 | 0.0735                | 0.2072 |
| Acads                           | acyl-Coenzyme A dehydrogenase, C-2 to C-3 short chain                | -0.3206                        | -0.1377           | -0.8963* | -0.4554           | -0.5758  | 0.0648         | 0.2723            | 0.0037 | 0.0415                | 0.0307 |
| Acadv1                          | acyl-Coenzyme A dehydrogenase, very long chain                       | -0.3718                        | -0.0614           | -0.6529* | -0.2551           | -0.2811  | 0.0038         | 0.3939            | 0.0026 | 0.0177                | 0.1153 |
| Echdc2                          | enoyl Coenzyme A hydratase domain containing 2                       | -0.5552                        | 0.0400            | -0.5864* | -0.0096           | -0.0312  | 0.0024         | 0.7575            | 0.0027 | 0.9477                | 0.8474 |
| Echdc3                          | enoyl Coenzyme A hydratase domain containing 3                       | -0.4181                        | -0.2329           | -0.5110  | -0.3401           | -0.0928  | 0.0242         | 0.1646            | 0.0103 | 0.0309                | 0.5188 |

|        |                                                                                                |          |         |          |          |         |        |        |        |        |        |
|--------|------------------------------------------------------------------------------------------------|----------|---------|----------|----------|---------|--------|--------|--------|--------|--------|
| Ehhadh | enoyl-Coenzyme A, hydratase/3-hydroxyacyl Coenzyme A dehydrogenase                             | -0.7149* | -0.4026 | -0.7903* | -0.5152  | -0.0754 | 0.0207 | 0.0207 | 0.0082 | 0.0153 | 0.7911 |
| Hadha  | hydroxyacyl-Coenzyme A dehydrogenase/3-ketoacyl-Coenzyme A thiolase/enoyl-Coenzyme A hydratase | -0.4056  | -0.0500 | -0.6540* | -0.2645  | -0.2484 | 0.0014 | 0.5167 | 0.0005 | 0.0411 | 0.0674 |
| Acaa2  | Acetyl-Coenzyme A acyltransferase 2                                                            | -0.3567  | -0.2701 | -0.8397* | -0.7693* | -0.4830 | 0.2965 | 0.1952 | 0.0044 | 0.0240 | 0.1682 |

\* denotes  $p < 0.05$  compared to the corresponding sham controls.

**Table S3. Intermediates of glycolysis**

|          | Sham 8W |         | CH      |         | CH <sub>COV</sub> |         | Sham 16W |         | HF      |         | HF <sub>COV</sub> |         | <i>p</i> value    |                                  |                             |                    |                                   |                             |              |
|----------|---------|---------|---------|---------|-------------------|---------|----------|---------|---------|---------|-------------------|---------|-------------------|----------------------------------|-----------------------------|--------------------|-----------------------------------|-----------------------------|--------------|
| Name/ppb | Mean    | SD      | Mean    | SD      | Mean              | SD      | Mean     | SD      | Mean    | SD      | Mean              | SD      | CH vs.<br>Sham 8W | CH <sub>COV</sub> vs.<br>Sham 8W | CH vs.<br>CH <sub>COV</sub> | HF vs.<br>Sham 16W | HF <sub>COV</sub> vs.<br>Sham 16W | HF vs.<br>HF <sub>COV</sub> | CH<br>vs. HF |
| G6P      | 78893.1 | 16650.5 | 87011.2 | 15884.3 | 72153.4           | 13967.1 | 74376.9  | 16394.7 | 57995.5 | 28505.4 | 77834.4           | 24728.8 | 0.408             | 0.465                            | 0.116                       | 0.272              | 0.801                             | 0.254                       | 0.054        |
| F6P      | 10853.0 | 2251.5  | 11486.5 | 1906.0  | 10207.6           | 1536.7  | 10918.6  | 2148.8  | 7339.0  | 3924.6  | 11536.8           | 3321.3  | 0.610             | 0.575                            | 0.230                       | 0.085              | 0.727                             | 0.091                       | 0.042        |
| FBP      | 8506.3  | 1123.5  | 9358.7  | 1163.5  | 8402.9            | 5364.3  | 975.9    | 975.0   | 8587.9  | 2201.1  | 8565.7            | 1611.6  | 0.226             | 0.461                            | 0.708                       | 0.657              | 0.599                             | 0.985                       | 0.466        |
| G3P      | 24495.5 | 4426.8  | 25658.9 | 4252.5  | 22195.5           | 3929.8  | 23279.0  | 4118.7  | 18901.2 | 7556.9  | 24100.4           | 6275.9  | 0.652             | 0.364                            | 0.174                       | 0.269              | 0.817                             | 0.252                       | 0.085        |
| 2PG/3PG  | 2735.4  | 451.5   | 1917.1  | 487.1   | 2091.9            | 661.0   | 2758.8   | 409.22  | 1066.6  | 293.6   | 1882.4            | 568.4   | 0.013             | 0.077                            | 0.613                       | <0.001             | 0.008                             | 0.013                       | 0.004        |
| PEP      | 232.1   | 91.2    | 161.8   | 52.8    | 125.6             | 29.5    | 227.7    | 100.8   | 112.1   | 43.2    | 161.8             | 45.0    | 0.133             | 0.021                            | 0.173                       | 0.030              | 0.222                             | 0.095                       | 0.105        |
| Pyruvate | 92.1    | 11.7    | 58.8    | 27.2    | 78.7              | 12.6    | 97.9     | 16.3    | 54.0    | 5.7     | 84.9              | 17.0    | 0.020             | 0.087                            | 0.134                       | 0.001              | 0.226                             | 0.005                       | 0.688        |

Abbreviations: 2PG, 2-phosphoglycerate; 3PG, 3-phosphoglycerate; CH, compensated hypertrophy; COV, correction of volume overload; F6P, fructose 6-phosphate; FBP, fructose 1,6-bisphosphate; G3P, glyceraldehyde 3-phosphate; HF, heart failure; PEP, phosphoenolpyruvate; SD, standard variation.

**Table S4. Intermediates of the hexosamine biosynthetic pathway**

|                          | Sham 8W |       | CH    |       | CH <sub>cov</sub> |       | Sham 16W |       | HF    |       | HF <sub>cov</sub> |       | <i>p</i> value    |                                  |                             |                    |                                   |                             |              |
|--------------------------|---------|-------|-------|-------|-------------------|-------|----------|-------|-------|-------|-------------------|-------|-------------------|----------------------------------|-----------------------------|--------------------|-----------------------------------|-----------------------------|--------------|
| Name/ $\mu$ M            | Mean    | SD    | Mean  | SD    | Mean              | SD    | Mean     | SD    | Mean  | SD    | Mean              | SD    | CH vs.<br>Sham 8W | CH <sub>cov</sub> vs.<br>Sham 8W | CH vs.<br>CH <sub>cov</sub> | HF vs.<br>Sham 16W | HF <sub>cov</sub> vs.<br>Sham 16W | HF vs.<br>HF <sub>cov</sub> | CH vs.<br>HF |
| Glucosamine-6-phosphate  | 0.033   | 0.008 | 0.033 | 0.010 | 0.038             | 0.011 | 0.032    | 0.009 | 0.040 | 0.011 | 0.052             | 0.015 | 0.961             | 0.358                            | 0.416                       | 0.208              | 0.020                             | 0.198                       | 0.274        |
| UDP                      | 155.9   | 14.5  | 210.9 | 50.4  | 168.5             | 42.7  | 175.7    | 53.8  | 170.1 | 16.0  | 192.5             | 38.5  | 0.044             | 0.520                            | 0.061                       | 0.817              | 0.549                             | 0.259                       | 0.119        |
| UDP-N-acetyl-glucosamine | 0.282   | 0.018 | 0.388 | 0.048 | 0.355             | 0.065 | 0.309    | 0.030 | 0.474 | 0.055 | 0.392             | 0.025 | 0.002             | 0.039                            | 0.243                       | <0.001             | <0.001                            | 0.007                       | 0.016        |

Abbreviations: CH, compensated hypertrophy; COV, correction of volume overload; HF, heart failure; SD, standard variation; UDP, uridine diphosphate.

**Table S5. Acylcarnitines**

|               | Sham 8W |        | CH      |        | CH <sub>COV</sub> |        | Sham 16W |        | HF      |         | HF <sub>COV</sub> |        | <i>p</i> value    |                                  |                             |                    |                                   |                             |              |
|---------------|---------|--------|---------|--------|-------------------|--------|----------|--------|---------|---------|-------------------|--------|-------------------|----------------------------------|-----------------------------|--------------------|-----------------------------------|-----------------------------|--------------|
| Name/ppb      | Mean    | SD     | Mean    | SD     | Mean              | SD     | Mean     | SD     | Mean    | SD      | Mean              | SD     | CH vs.<br>Sham 8W | CH <sub>COV</sub> vs.<br>Sham 8W | CH vs.<br>CH <sub>COV</sub> | HF vs.<br>Sham 16W | HF <sub>COV</sub> vs.<br>Sham 16W | HF vs.<br>HF <sub>COV</sub> | CH vs.<br>HF |
| L-carnitine   | 55366.7 | 8215.4 | 57120.0 | 1587.3 | 53266.7           | 8390.5 | 58728.0  | 6505.9 | 38263.3 | 13222.2 | 53443.3           | 6996.7 | 0.549             | 0.638                            | 0.316                       | 0.001              | 0.148                             | 0.032                       | 0.006        |
| C2 acetyl     | 14701.8 | 1589.0 | 14526.7 | 2725.7 | 17565.0           | 2773.1 | 14185.7  | 3655.9 | 19292.0 | 2484.2  | 18342.9           | 2134.2 | 0.868             | 0.081                            | 0.101                       | 0.011              | 0.012                             | 0.493                       | 0.015        |
| C3 propionyl  | 259.8   | 63.0   | 318.6   | 47.9   | 209.7             | 76.3   | 248.1    | 45.2   | 245.5   | 46.2    | 320.2             | 83.4   | 0.075             | 0.188                            | 0.014                       | 0.912              | 0.024                             | 0.078                       | 0.023        |
| C4 butyryl    | 245.1   | 80.5   | 242.4   | 54.1   | 352.9             | 134.8  | 207.0    | 47.0   | 521.1   | 88.2    | 360.9             | 100.9  | 0.944             | 0.082                            | 0.097                       | <0.001             | 0.006                             | 0.012                       | <0.001       |
| C4 isobutyryl | 27.1    | 27.2   | 31.3    | 10.7   | 23.6              | 16.7   | 23.5     | 11.0   | 45.6    | 25.1    | 37.0              | 16.3   | 0.719             | 0.776                            | 0.360                       | 0.014              | 0.039                             | 0.473                       | 0.227        |
| C5 valeryl    | 41.9    | 19.3   | 48.7    | 7.3    | 46.4              | 23.1   | 43.7     | 11.7   | 65.9    | 31.1    | 68.5              | 22.8   | 0.285             | 0.661                            | 0.827                       | 0.029              | 0.004                             | 0.864                       | 0.240        |
| C6 hexanoyl   | 51.3    | 19.4   | 61.8    | 18.9   | 62.0              | 23.5   | 46.4     | 21.7   | 86.7    | 22.3    | 70.8              | 20.3   | 0.288             | 0.316                            | 0.989                       | 0.002              | 0.030                             | 0.206                       | 0.064        |
| C8 octanoyl   | 20.5    | 7.1    | 26.2    | 9.7    | 20.3              | 3.4    | 16.5     | 5.2    | 29.0    | 7.9     | 24.4              | 8.5    | 0.186             | 0.947                            | 0.230                       | 0.002              | 0.031                             | 0.329                       | 0.586        |
| C10 decanoyl  | 10.7    | 3.5    | 13.0    | 4.3    | 14.5              | 8.6    | 8.8      | 2.6    | 17.6    | 1.1     | 13.2              | 3.6    | 0.239             | 0.208                            | 0.716                       | <0.001             | 0.010                             | 0.016                       | 0.030        |
| C12 lauroly   | 13.1    | 4.4    | 14.5    | 4.5    | 13.6              | 1.5    | 12.2     | 3.8    | 22.2    | 4.1     | 17.7              | 5.7    | 0.544             | 0.767                            | 0.683                       | <0.001             | 0.029                             | 0.133                       | 0.011        |
| C14 myristoyl | 76.2    | 37.8   | 74.7    | 36.3   | 97.5              | 24.0   | 77.1     | 29.3   | 127.2   | 22.8    | 154.5             | 93.4   | 0.937             | 0.276                            | 0.260                       | 0.004              | 0.033                             | 0.502                       | 0.013        |
| C16 palmitoyl | 81.0    | 32.1   | 104.1   | 82.6   | 131.0             | 9.5    | 78.9     | 37.4   | 169.0   | 119.3   | 172.8             | 134.7  | 0.417             | 0.005                            | 0.463                       | 0.034              | 0.041                             | 0.960                       | 0.314        |
| C18 stearoyl  | 3.0     | 0.5    | 3.2     | 1.2    | 3.4               | 0.2    | 2.9      | 0.6    | 3.9     | 0.7     | 3.8               | 1.3    | 0.553             | 0.086                            | 0.777                       | 0.013              | 0.047                             | 0.931                       | 0.305        |

Abbreviations: CH, compensated hypertrophy; COV, correction of volume overload; HF, heart failure; SD, standard variation.

Table S6. Intermediates of the tricarboxylic acid cycle

|            | Sham 8W  |          | CH        |          | CH <sub>cov</sub> |          | Sham 16W  |          | HF        |          | HF <sub>cov</sub> |          | p value           |                                  |                             |                    |                                   |                             |              |
|------------|----------|----------|-----------|----------|-------------------|----------|-----------|----------|-----------|----------|-------------------|----------|-------------------|----------------------------------|-----------------------------|--------------------|-----------------------------------|-----------------------------|--------------|
| Name/ppb   | Mean     | SD       | Mean      | SD       | Mean              | SD       | Mean      | SD       | Mean      | SD       | Mean              | SD       | CH vs.<br>Sham 8W | CH <sub>cov</sub> vs.<br>Sham 8W | CH vs.<br>CH <sub>cov</sub> | HF vs.<br>Sham 16W | HF <sub>cov</sub> vs.<br>Sham 16W | HF vs.<br>HF <sub>cov</sub> | CH<br>vs. HF |
| Citrate    | 48146.7  | 6388.3   | 41521.7   | 10861.3  | 40253.6           | 8447.7   | 41079.7   | 7145.1   | 42566.3   | 14894.7  | 46832.2           | 9898.2   | 0.708             | 0.824                            | 0.826                       | 0.830              | 0.275                             | 0.572                       | 0.892        |
| Isocitrate | 1996.2   | 991.5    | 1124.7    | 350.3    | 1288.4            | 488.3    | 1546.3    | 556.9    | 1980.4    | 1758.5   | 1470.2            | 561.4    | 0.070             | 0.362                            | 0.520                       | 0.585              | 0.818                             | 0.514                       | 0.270        |
| Succinate  | 576291.7 | 314916.6 | 1480521.5 | 908208.2 | 1060302.4         | 438220.4 | 1082788.2 | 682330.4 | 1401680.5 | 896304.2 | 1247481.6         | 910422.0 | 0.129             | 0.551                            | 0.339                       | 0.504              | 0.730                             | 0.774                       | 0.888        |
| Fumarate   | 51768.1  | 36331.9  | 82106.8   | 58713.9  | 81058.0           | 71994.9  | 60637.1   | 28664.3  | 109616.5  | 61868.9  | 91408.4           | 48602.7  | 0.639             | 0.692                            | 0.978                       | 0.116              | 0.211                             | 0.597                       | 0.469        |
| Malate     | 84468.4  | 42376.9  | 84150.8   | 39524.2  | 106978.7          | 42063.0  | 63426.2   | 31751.3  | 77899.4   | 21141.3  | 122671.4          | 79132.1  | 0.535             | 0.075                            | 0.378                       | 0.375              | 0.120                             | 0.429                       | 0.740        |

Abbreviations: CH, compensated hypertrophy; COV, correction of volume overload; HF, heart failure; SD, standard variation.

**Table S7. Oligonucleotide sequences of primers**

|        |         |                              |
|--------|---------|------------------------------|
| Pdp2   | Forward | 5'-GAGGATACTAGGCTGAAAAAC-3'  |
|        | Reverse | 5'-CCTCCATTTCACTTGATTCC-3'   |
| Ehhadh | Forward | 5'-GTTGCTCTTGACCTAATTACC-3'  |
|        | Reverse | 5'-GCAAATTTGATGGCTTCTTC-3'   |
| Acaa2  | Forward | 5'-CTACTTTGTGTCTGGATGTG-3'   |
|        | Reverse | 5'-ATGCTTCATTCACGTCTATC-3'   |
| Acads  | Forward | 5'-TCCAAAACATCCAGTTCAAG-3'   |
|        | Reverse | 5'-GGTGAAAGGCTTCTTATTGTC-3'  |
| Pfkfb1 | Forward | 5'-GGCTATAAGACCTTCTTTGTTG-3' |
|        | Reverse | 5'-TTCTTCATCCAGAGACTCATAG-3' |
| Eno3   | Forward | 5'-CCAAAGAAGACATTACAGCC-3'   |
|        | Reverse | 5'-CAGGTATCGTGATTTGTCTC-3'   |
| Rxra   | Forward | 5'-TCTTCAACCCTGACTCTAAG-3'   |
|        | Reverse | 5'-CTAGTGATGCATACACCTTC-3'   |
| Aldob  | Forward | 5'-CATCATGTTTACCTTGAGGG-3'   |
|        | Reverse | 5'-GACAAAAAGCAGATACCAGG-3'   |



Supplemental figures

A. Canonical pathway analysis in the CH phase

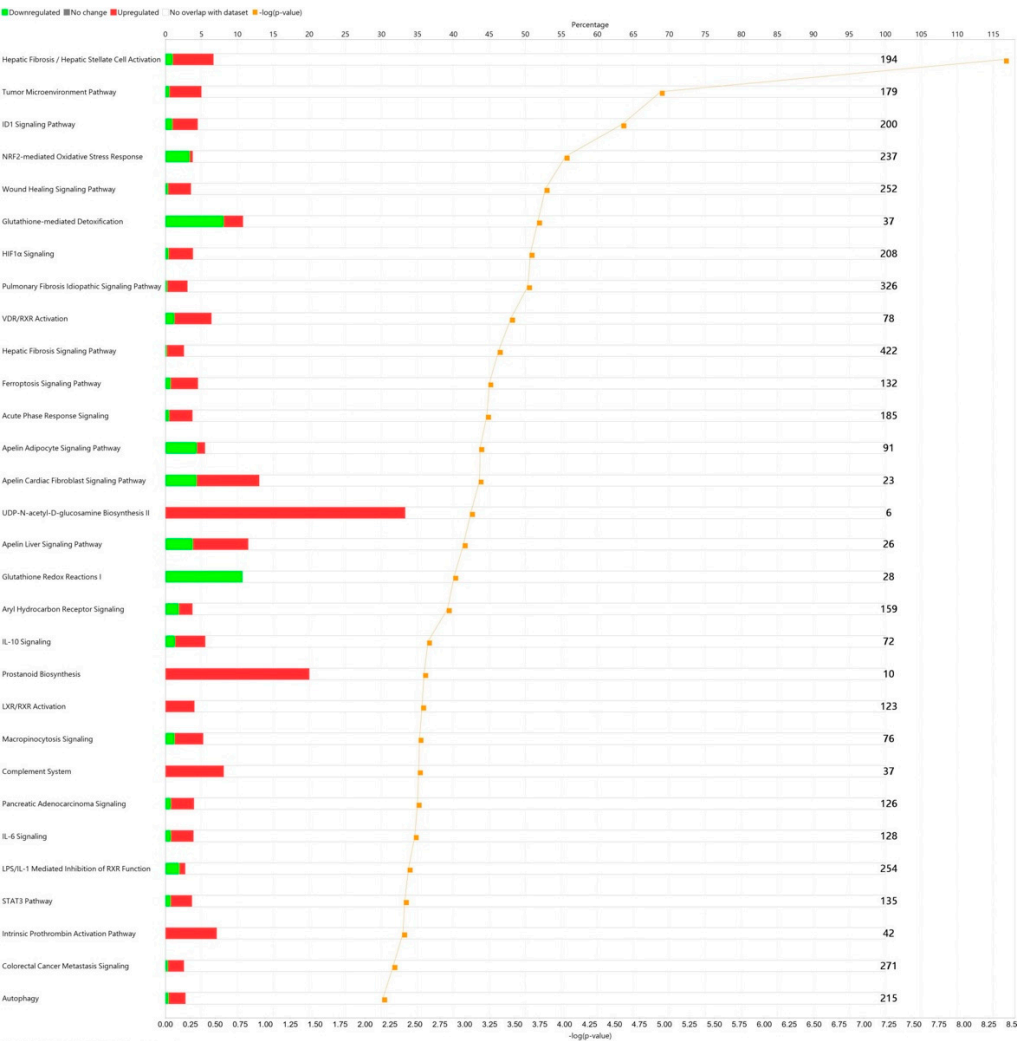

B. Canonical pathway analysis in the CH<sub>COV</sub> phase

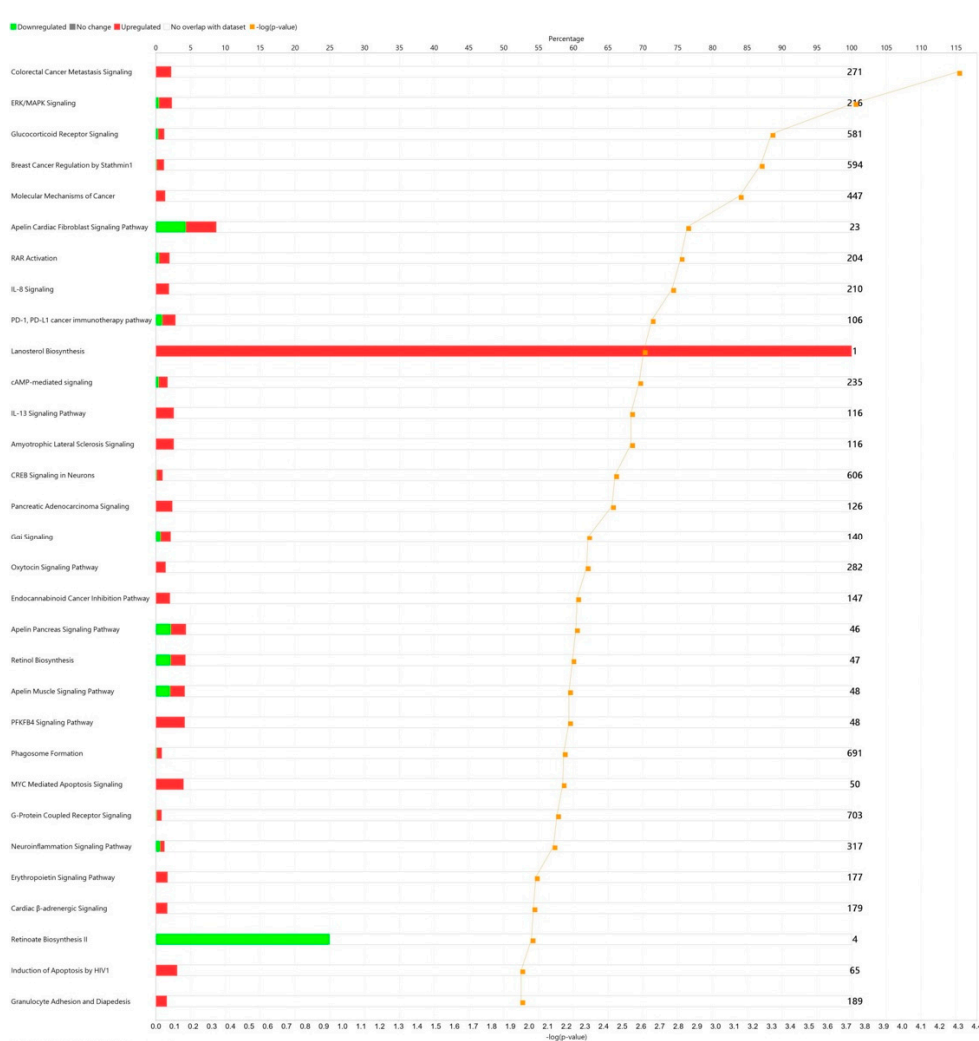

**Figure S1.** Transcriptomics analyses of rats with volume overload (VO) or with correction of VO. Pathway enrichment analyses of the differentially expressed genes (fold change > 1.5 and P < 0.05; ranked by -log [P value] of each pathway) in volume-overloaded rats in the compensated hypertrophy (CH) phase (A) and in VOed rats with correction of VO in the CH phase (CH<sub>COV</sub>). n = 4 per group.

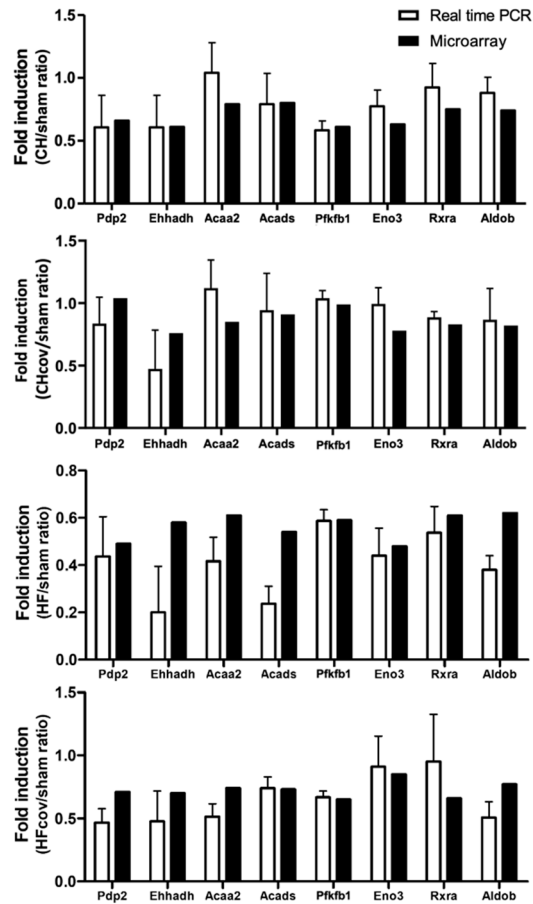

**Figure S2.** Comparison between quantitative polymerase chain reaction (qPCR) and microarray analysis of specific metabolic genes in different phases of volume overload. Data are expressed as log fold change. Genes with downregulation in the microarray analysis in at least one phase investigated were selected.  $n = 4$  per group. CH, compensated hypertrophy; CHcov, correction of volume overload in the compensated hypertrophy phase; HF, heart failure; HFcov, correction of volume overload in the heart failure phase.

## CH

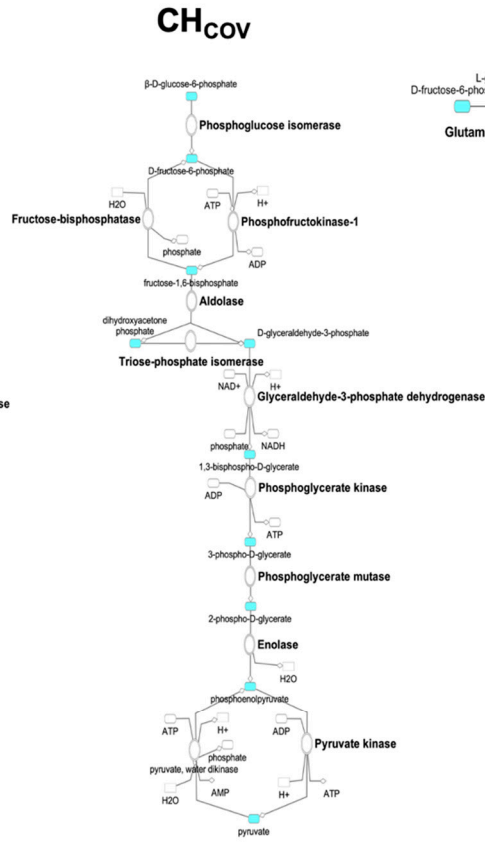

## CH

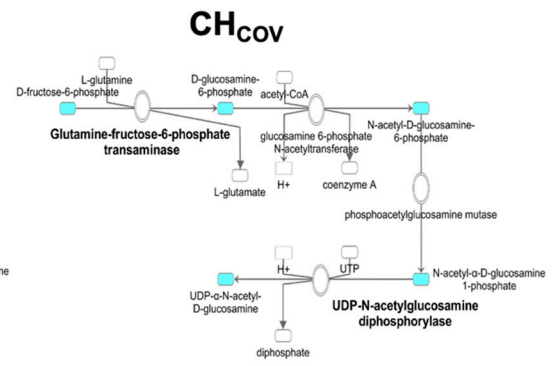

## CH

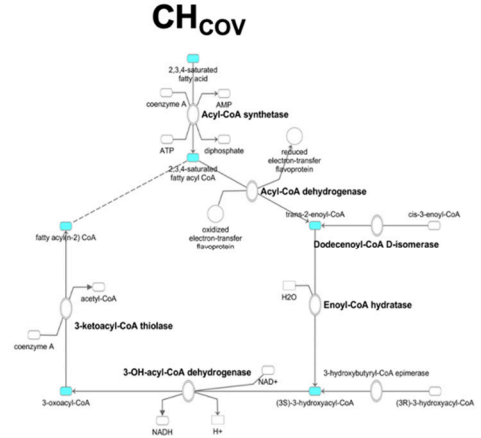

**Figure S3.** Differential expression of genes (fold change > 1.5 and P < 0.05) involved in glycolysis (A), hexosamine biosynthetic pathway (B), and fatty acid oxidation (C) in volume-overloaded rats in the compensated hypertrophic (CH) phase and in volume-overloaded rats after correction of volume overload in the CH phase (CH<sub>COV</sub>). The ovals in the maps represent enzymes in each metabolic pathway, with red and green denoting upregulation and downregulation of gene expression, respectively. n = 4 per group.
